# Supplementary material for: Multicenter Phase I Trial of a DNA Vaccine Encoding the Androgen Receptor Ligand-binding Domain (pTVG-AR, MVI-118) in Patients with Metastatic Prostate Cancer
Source: Oxford University Press journal article supplement (doi:10.1158/1078-0432.ccr-20-0945), 2020-06-08
Supplement: 10780432ccr200945-sup-239094_2_supp_6313727_q4qz9g.docx [file 10780432ccr200945-sup-239094_2_supp_6313727_q4qz9g.docx]

**Supplementary Figure Legends:**

**Supplementary Figure 1:** T-cell immunological response to PSA over time: Panel A: IFNγ ELISPOT data, similar to that as shown in Figure 3, were plotted over time, subtracting the pre-treatment value, to evaluate the magnitude and durability of immunity over time. Panel B: Immune response over time was plotted as “area under the curve,” and evaluated with respect to treatment arm. Lines show median and interquartile range.

**Supplementary Figure 2:** T-cell immunological response to tetanus toxoid over time: Panel A: IFNγ ELISPOT data, similar to that as shown in Figure 3, were plotted over time, subtracting the pre-treatment value, to evaluate the magnitude and durability of immunity over time. Panel B: Immune response over time was plotted as “area under the curve,” and evaluated with respect to treatment arm. Lines show median and interquartile range.

**Supplementary Figure 3:** IgG immunological response: IgG responses to AR LBD protein (panel A), PSA protein (panel B), and tetanus toxoid (panel C) were evaluated by Luminex. Sera samples were assessed at a 1:100 dilution from the time points indicated. Data were plotted over time, subtracting the pre-treatment value to evaluate change in post-treatment specimens.
